# Supplementary material for: Effects of ultrasonication time on stability, dynamic viscosity, and pumping power management of MWCNT-water nanofluid: an experimental study
Source: PubMed Central journal article supplement (PMC7494922; doi:10.1038/s41598-020-71978-9), 2020-09-16
Supplement: 41598_2020_71978_MOESM1_ESM.pdf [file 41598_2020_71978_MOESM1_ESM.pdf]

# Effects of Ultrasonication Time on Stability, Dynamic Viscosity, and Pumping Power Management of MWCNT-Water Nanofluid: An Experimental Study

Amin Asadi<sup>1,2\*</sup>, Ibrahim M. Alarifi<sup>3,4</sup>

<sup>1</sup>Institute of Research and Development, Duy Tan University, Da Nang 550000, Vietnam.

<sup>2</sup>Faculty of Natural Sciences, Duy Tan University, Da Nang 550000, Vietnam.

<sup>3</sup>Department of Mechanical and Industrial Engineering, College of Engineering, Majmaah University, Al-Majmaah 11952, Riyadh, Saudi Arabia

<sup>4</sup>Engineering and Applied Science Research Center, Majmaah University, Al-Majmaah 11952, Riyadh, Saudi Arabia

\*Corresponding author: [aminasadi@duytan.edu.vn](mailto:aminasadi@duytan.edu.vn)

## Supporting information:

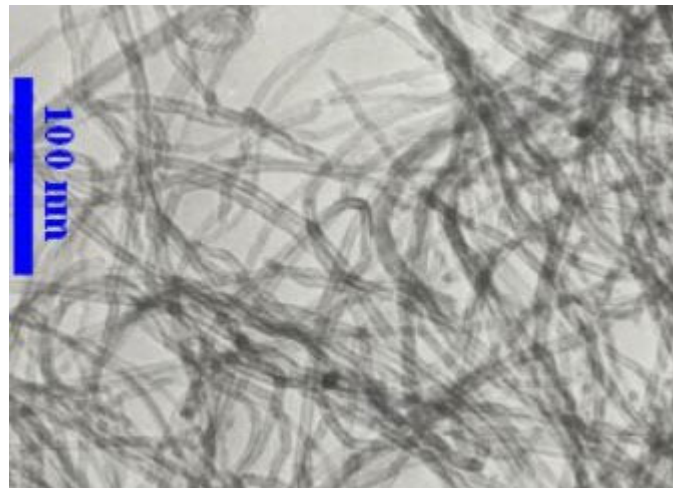

Fig. I. TEM image of MWCNT particles [55] (Reprinted with the permission of Elsevier).

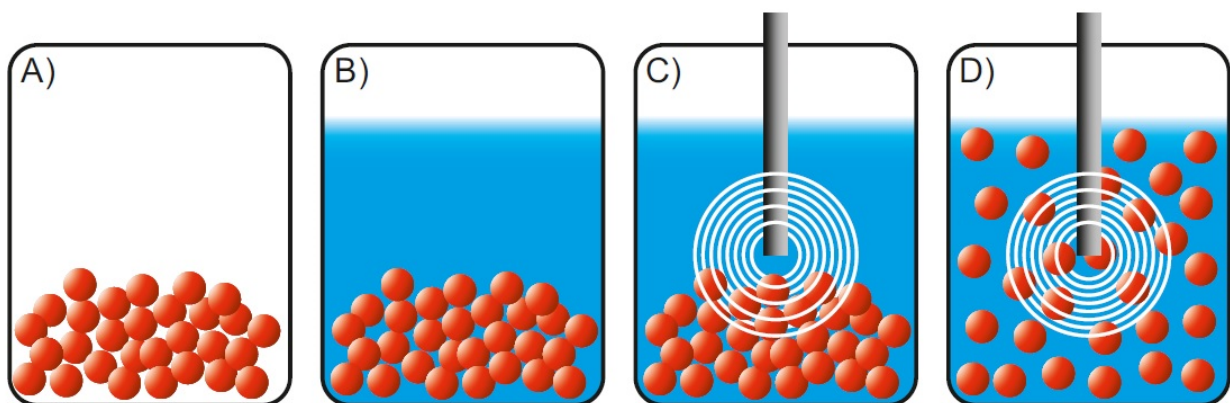

Fig. II. A schematic view of different stages of the two-step method [56] (Reprinted with the permission of Elsevier).

**1<sup>st</sup> day**

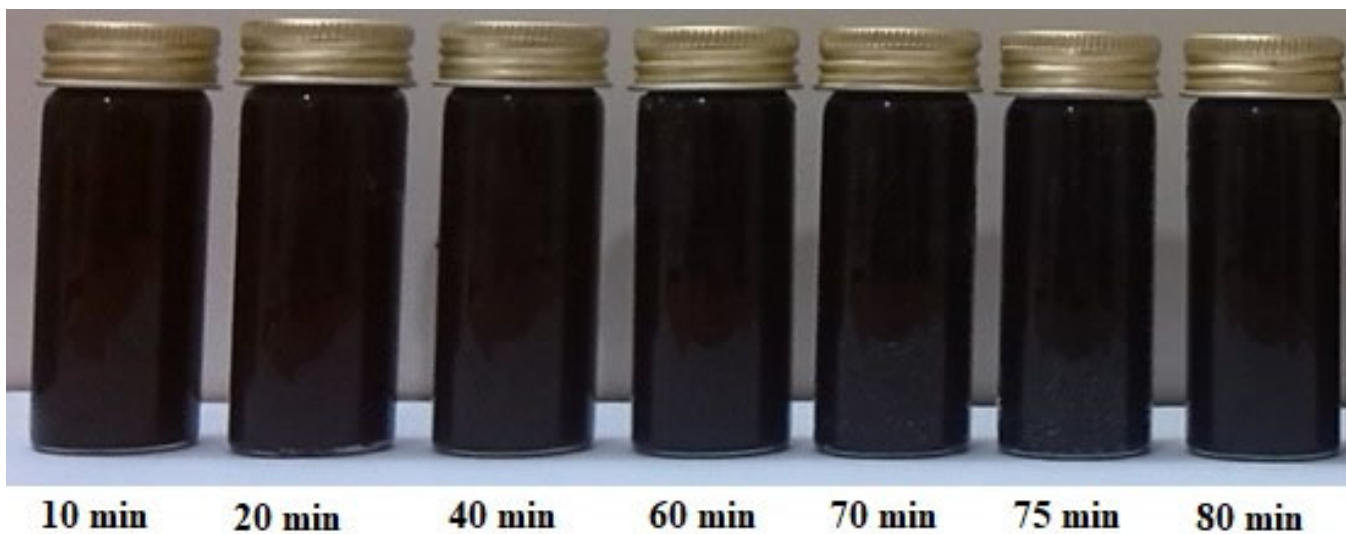

**5<sup>th</sup> day**

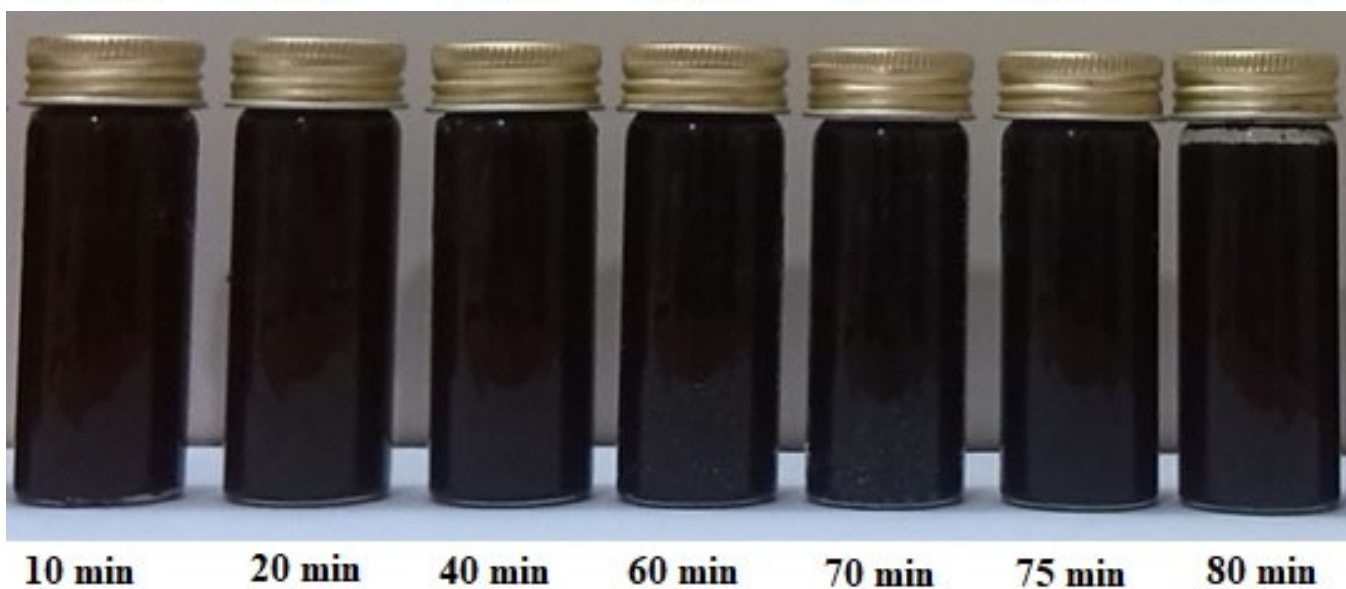

**10<sup>th</sup> day**

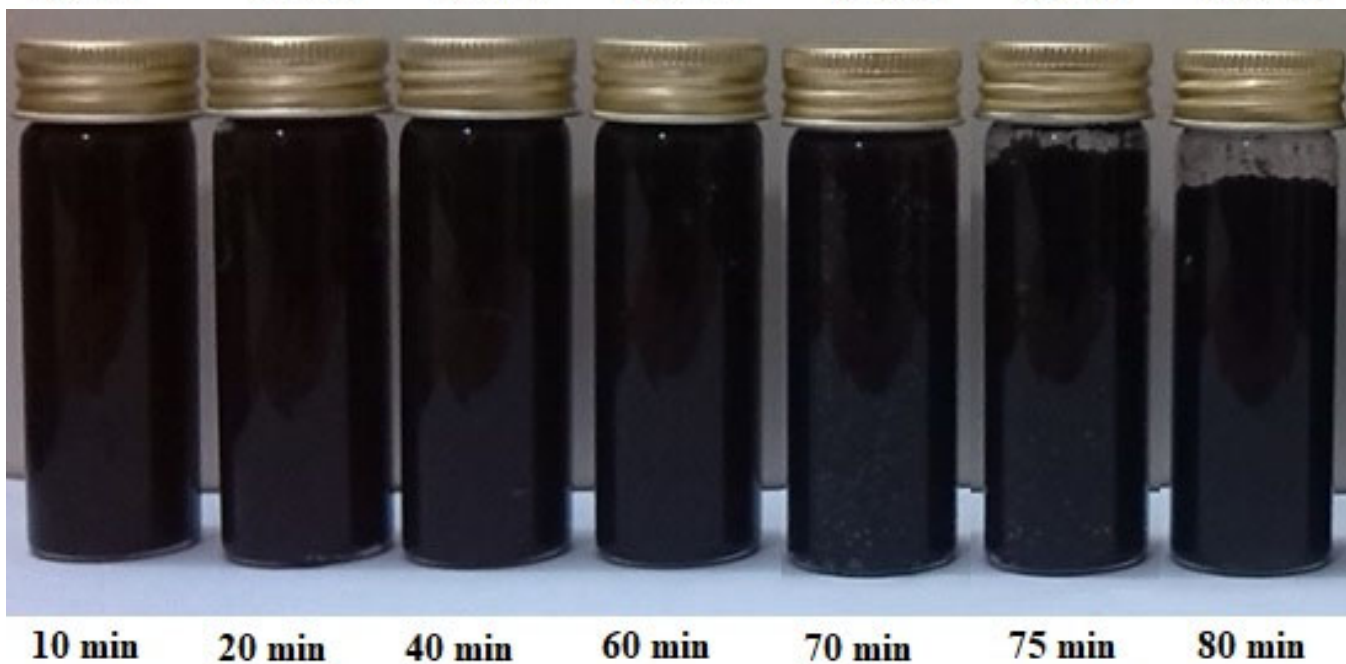

30<sup>th</sup> day

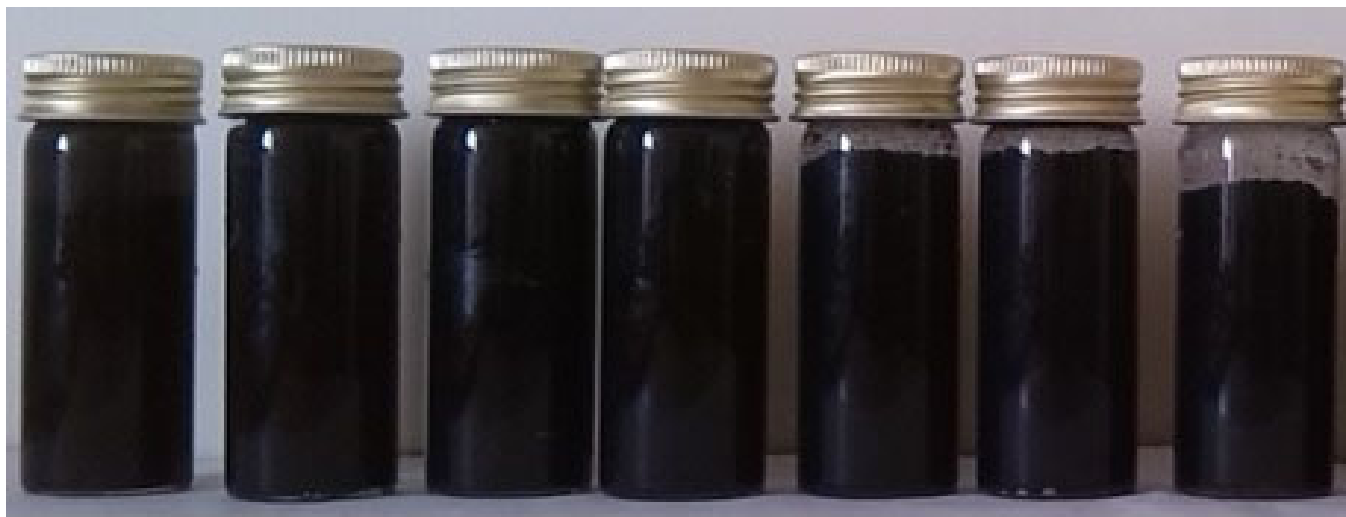

10 min    20 min    40 min    60 min    70 min    75 min    80min

Fig. III. Stability analysis of the NF samples through visual observation over 30 days after preparation [38]  
(Reprinted with the permission of Elsevier).

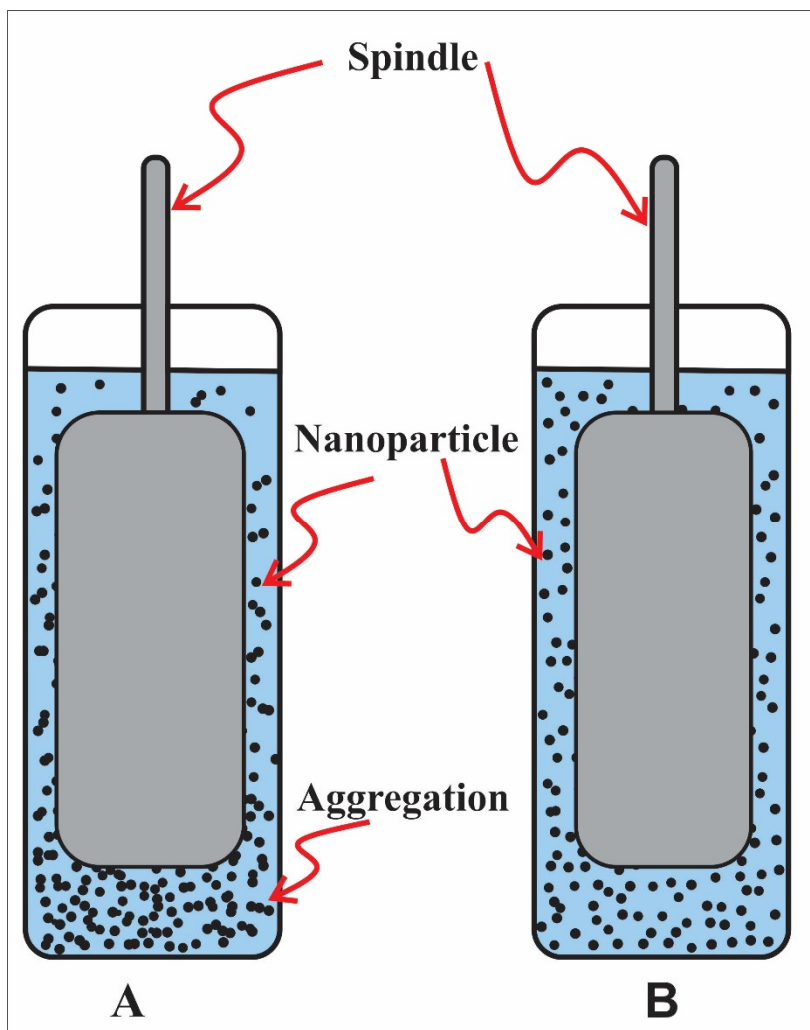

**Fig. IV. A schematic view of the effect of ultrasonication on breaking down the cluster of particles and decreasing the viscosity; A) before ultrasonication, and B) after ultrasonication [36] (Reprinted with the permission of Elsevier).**

**Tab. I. Detailed information of MWCNT particles [55] (Reprinted with the permission of Elsevier).**

|                                |                                |
|--------------------------------|--------------------------------|
| <b>Outside diameter</b>        | <b>&lt;7 nm</b>                |
| <b>Inside diameter</b>         | <b>2-5 nm</b>                  |
| <b>Length</b>                  | <b>10-30 <math>\mu</math>m</b> |
| <b>SSA</b>                     | <b>&gt;500 m<sup>2</sup>/g</b> |
| <b>Electrical conductivity</b> | <b>&gt;100 s/cm</b>            |
| <b>True density</b>            | <b>2.1 g/cm<sup>3</sup></b>    |
| <b>Purity</b>                  | <b>&gt;95 wt %</b>             |
